## Nanobody engineering for SARS-CoV-2 neutralization and detection

Liina Hannula<sup>1</sup>, Suvi Kuivanen<sup>2</sup>, Jonathan Lasham<sup>3</sup>, Ravi Kant<sup>2,4†</sup>, Lauri Kareinen<sup>2,4†</sup>, Mariia Bogacheva<sup>2</sup>, Tomas Strandin<sup>4</sup>, Tarja Sironen<sup>2,4</sup>, Vivek Sharma<sup>1,3</sup>, Petri Saviranta<sup>5</sup>, Anja Kipar<sup>6,7</sup>, Olli Vapalahti<sup>2,4,8</sup>, Juha T. Huiskonen<sup>1</sup> and Ilona Rissanen<sup>1, \*</sup>.

<sup>1</sup>*Institute of Biotechnology, Helsinki Institute of Life Science HiLIFE, University of Helsinki, Helsinki, Finland.*

<sup>2</sup>*Department of Virology, Medicum, Faculty of Medicine, University of Helsinki, Helsinki, Finland.*

<sup>3</sup>*Department of Physics, University of Helsinki, Helsinki, Finland.*

<sup>4</sup>*Departments of Veterinary Biosciences, University of Helsinki, Helsinki, Finland.*

<sup>5</sup>*VTT Technical Research Centre of Finland Ltd., FI-02044 VTT, Finland.*

<sup>6</sup>*Laboratory for Animal Model Pathology, Institute of Veterinary Pathology, Vetsuisse Faculty, University of Zurich, 8057 Zurich, Switzerland.*

<sup>7</sup>*Department of Infection Biology & Microbiomes, Institute of Infection, Veterinary and Ecological Sciences, University of Liverpool, Liverpool L3 3RF, UK.*

<sup>8</sup>*HUSLAB, Helsinki University Hospital, Helsinki, Finland.*

† Equal contributions

\*Corresponding author

**Keywords:** SARS-CoV-2, nanobody, virus neutralization, neutralization escape

## 1 **Abstract**

2 In response to the ongoing SARS-CoV-2 pandemic, the quest for coronavirus inhibitors has  
3 inspired research on a variety of small proteins beyond conventional antibodies, including  
4 robust single-domain antibody fragments, ‘nanobodies’. Here, we explore the potential of  
5 nanobody engineering in the development of antivirals and diagnostic tools. Through fusion of  
6 nanobody domains that target distinct binding sites, we engineered multimodular nanobody  
7 constructs that neutralize wild-type SARS-CoV-2 and the Alpha and Delta variants with high  
8 potency, with IC<sub>50</sub> values up to 50 pM. However, we observed a limitation in the efficacy of  
9 multimodular nanobodies against the Beta (B.1.351) and Omicron variants (B.1.1.529),  
10 underlining the importance of accounting for antigenic drift in the design of biologics. To  
11 further explore the applications of nanobody engineering in outbreak management, we present  
12 a novel diagnostic assay, based on fusions of nanobodies with fragments of NanoLuc luciferase  
13 that can detect sub-nanomolar quantities of the SARS-CoV-2 spike protein in a single step.  
14 Our work showcases the potential of nanobody engineering to combat emerging infectious  
15 disease.

16

## 17 **Introduction**

18 Antibody-based products comprise some of the most successful diagnostic and therapeutic  
19 tools developed for managing the COVID-19 pandemic, ranging from at-home rapid antigen  
20 tests for SARS-CoV-2 infection (1, 2) to neutralizing monoclonal antibodies (mAbs) used to  
21 treat COVID-19 in individuals at risk of severe disease (2, 3). Neutralizing antibodies against  
22 SARS-CoV-2 primarily target the Spike (S) protein (4, 5), a glycoprotein that mediates host-  
23 cell recognition and viral entry (6). SARS-CoV-2 spikes are homotrimers, with each S chain  
24 consisting of receptor-binding (S1) and fusogenic (S2) subunits (7). The S1 subunit contains

25 the receptor-binding domain (RBD) which mediates binding to the primary cellular receptor of  
26 SARS-CoV-2, angiotensin-converting enzyme 2 (ACE2) (6, 8, 9). Following receptor binding,  
27 the S2 subunit, a class I fusion protein, is activated by proteolytic cleavage and mediates the  
28 fusion of the viral and cell membranes, delivering viral RNA to the cytoplasm (8, 10).

29 Due to its key role in initiating infection, the SARS-CoV-2 spike is the primary target of both  
30 vaccines (11) and monoclonal antibody therapy (2). The continued efficacy of these powerful  
31 approaches is challenged by the emergence of SARS-CoV-2 variants of concern (VOCs) that  
32 display multiple amino acid substitutions in the S-protein (12-14). Following the spread of  
33 variants Alpha (B.1.1.7), Beta (B.1.351) and Delta (B.1.617.2) (15-20), Omicron (B.1.1.529)  
34 has become established as the dominant circulating variant in 2022, with new Omicron sub-  
35 variants still emerging (21). VOC amino acid changes, including E484K found in Beta and  
36 Omicron, can significantly reduce neutralization by antibodies raised against the ‘wild-type’  
37 SARS-CoV-2 (titled B.1 or Wuhan-Hu-1) (12, 15, 16, 19, 22). Current efforts to mitigate the  
38 effects of immune escape on antibody-based COVID-19 countermeasures include the use of  
39 antibody cocktails (23, 24) and the development of new antibody-based products, including  
40 camelid single-domain antibody fragments (‘nanobodies’) (25).

41 In contrast to traditional mAbs, nanobodies are small (~15 kDa) and offer many advantages  
42 including nebulized delivery and scalable, cost-effective production in bacterial expression  
43 systems (26, 27). During the COVID-19 pandemic, antiviral nanobodies have garnered  
44 significant interest, resulting in the discovery and structural characterization of several SARS-  
45 CoV-2-neutralizing nanobodies (27-37). Furthermore, as nanobodies comprise self-contained  
46 modules, they can be engineered into fusion proteins with enhanced properties. Pioneering  
47 studies have started to chart the potential of engineered nanobodies as virus inhibitors (38, 39),  
48 but their diagnostic applications are largely unexplored. While RT-qPCR remains the gold  
49 standard for clinical diagnosis, rapid diagnostic tests designed to detect viral antigens with

50 conventional antibodies (40) are extensively applied in nonhospital settings. To our knowledge,  
51 nanobodies have not, so far, been used for viral antigen detection in commercialized assays.  
52 Here, we explore an engineering strategy that leverages nanobody fusions for enhanced  
53 neutralization and in the development of a novel rapid-antigen assay. Tri-modular fusions of  
54 selected nanobodies showed up to a hundredfold enhancement of the *in vitro* neutralization  
55 efficiency against wild-type SARS-CoV-2 as compared to the reported efficiencies of the  
56 single constituent nanobodies (28-30, 41). We suggest that molecular dynamics (MD)  
57 simulations can be used to analyze the neutralization potential of nanobodies against VOCs, of  
58 which Beta and Omicron escaped neutralization, and offer a possible mechanistic explanation  
59 for the neutralization escape. Nanobody fusions were further engineered to produce proof-of-  
60 concept for a novel diagnostic assay, which applies nanobodies fused to fragments of a split  
61 signal molecule, NanoLuc luciferase (42-44), and allows the detection of picomolar  
62 concentrations of SARS-CoV-2 spike protein in a single step. Overall, our study shows the  
63 potential for engineered nanobodies as antiviral and diagnostic agents, which we envision can  
64 offer affordable and scalable countermeasures during future outbreaks of emerging viral  
65 diseases.

66

## 67 **Results**

68 **Structure-guided design of multimodular nanobodies.** Structural studies have elucidated  
69 key sites of vulnerability on SARS-CoV-2 (4, 45), including an ACE2-receptor binding  
70 interface that can be targeted to sterically hinder receptor engagement (46-48). Inspired by the  
71 trimeric structure of the coronaviral spike (Figure 1), we sought to develop an approach for  
72 targeting all three copies of RBD simultaneously to enhance SARS-CoV-2 inhibition.  
73 Cryogenic electron microscopy (cryo-EM) studies have identified two distinct SARS-CoV-2

74 RBD conformations, titled ‘up’ and ‘down’ (49, 50), where putative epitopes on neighboring  
75 RBDs are in proximity, within 40 to 74 Å from each other (SI Figure S1). To develop a tripartite  
76 binder that could be sterically accommodated within these tight constraints, we selected  
77 nanobodies, the smallest antibody-based protein inhibitors, as the base unit for  
78 multimodularization.

79 We designed three trimodular nanobodies (Figure 1B) using the sequences of four previously  
80 published monomeric nanobodies, Ty1 (47), H11-H4 (29), MR17-K99Y (30) and VHH V (41).  
81 These modules were selected based on two criteria: (i) distinct epitope and angle of binding to  
82 RBD (Figure 1C and SI Table S1), (ii) spatial proximity of the epitopes in the context of the  
83 SARS-CoV-2 spike, facilitating the simultaneous binding of all modules (Figure 1). While each  
84 individual module has been reported to neutralize wild-type SARS-CoV-2 with IC<sub>50</sub> (half-  
85 maximal inhibitory concentration) values ranging from 40 to 142 nM (SI Table S1), our  
86 multimodularization approach was designed to improve neutralization potency through  
87 increased avidity to the SARS-CoV-2 spike, and to test whether multimodular constructs can  
88 neutralize variants of concern.

89 Multimodular nanobodies were constructed by fusing multiple nanobodies together with  
90 flexible linkers of twenty amino acids (GGGGs<sub>x4</sub>) with the aim to improve the binding avidity  
91 (26, 39, 51-53). Furthermore, as modules targeting distinct epitopes can be included in the same  
92 construct, multimodularization has been proposed to reduce neutralization escape resulting  
93 from amino acid changes in viral proteins (41). Here, construct compositions were selected to  
94 test i) the effect of triplicating a single module (tri-Ty1, comprised of three Ty1 modules (47))  
95 on SARS-CoV-2 neutralization, and ii) whether the inclusion of variable modules can help  
96 mitigate neutralization escape by virus variants (41). To this end, multimodular constructs tri-  
97 Ty1, tri-TMH, and tri-TMV (Figure 1B) were generated, with tri-TMH and tri-TMV comprised  
98 of Ty1 (47) and MR17-K99Y (30) modules, followed by either a H11-H4 (29) or VHH V (41)

99 module, respectively. Tri-Ty1, tri-TMH, and tri-TMV readily expressed in *E.coli*, and were  
100 purified and enrolled in target binding and virus neutralization assays.

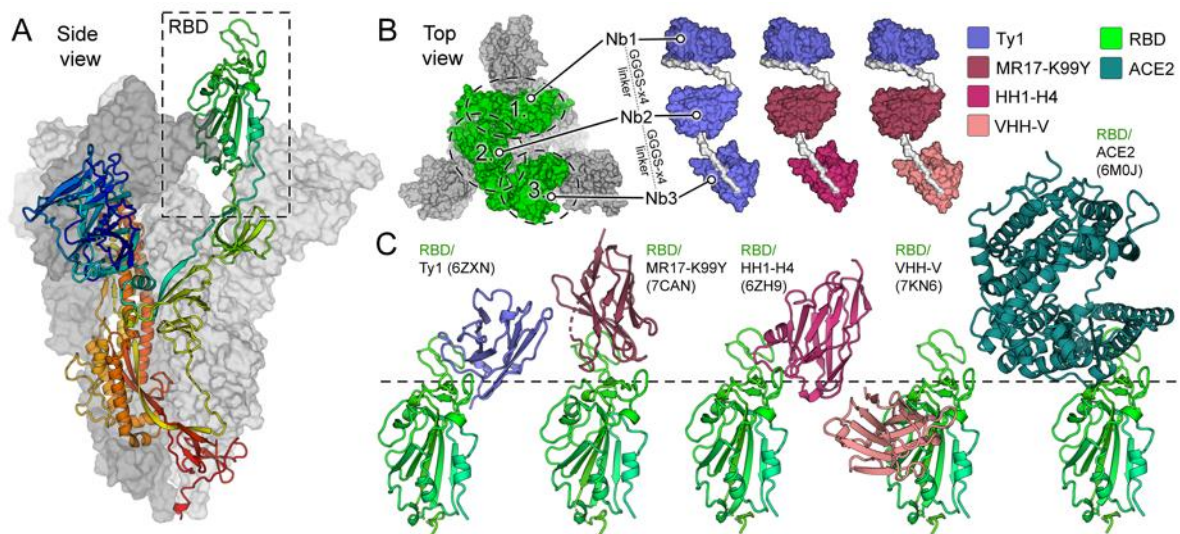

101

102 **Figure 1. Structure-based design of multimodular nanobodies targeting SARS-CoV-2 S.**  
103 **A)** Side view of the SARS-CoV-2 S-trimer (47). One trimer subunit, with a receptor-binding  
104 domain (RBD), in the 'up' conformation, is shown as a cartoon and colored as a rainbow  
105 ramped from blue (N-terminus) to red (C-terminus). The two other subunits are shown as  
106 surface representation in shades of grey. **B)** Three distinct multimodular nanobodies were  
107 designed: (i) tri-Ty1 with three repeats of Ty1 (47) module; (ii) tri-TMH with Ty1, MR-17-  
108 K99Y (30) and HH1-H4 (29) modules; and (iii) Tri-TMV with Ty1, MK and VHH-V (41)  
109 modules. The nanobody modules are connected by flexible GGGGSx4 linkers. **C)** Each of the  
110 nanobody domains (Ty1, MR17-K99Y, HH1-H4, and VHH-V) bind the RBD at a unique  
111 angle. Comparison to the structure of RBD bound to the primary host-cell entry receptor of  
112 SARS-CoV-2, ACE2 (6, 54) demonstrates that three of the modules bind epitopes proximal to  
113 the ACE2-binding site, while VHH-V targets an alternative neutralization epitope.

114

115 **Multimodular nanobodies bind variant forms of the RBD.** Amino acid changes observed  
116 in SARS-CoV-2 variants of concern have been linked to escape from antibody-mediated virus  
117 neutralization (15, 16, 55, 56) due to reduced affinity to epitopes where key amino acids have  
118 been altered. To determine how prominent RBD amino acid changes K417N, E484K, and  
119 N501Y impact the binding of trimodular nanobodies, we tested their binding to RBD and spike  
120 mutants in an antigen microarray. Nanobodies tri-Ty1, tri-TMH, and tri-TMV were tested  
121 against (i) wild-type RBD, (ii-iv) three RBD variants that displayed either K417N, E484K, or

122 N501Y amino acid change, (v) wild-type S1 subunit, and (vi) a S1 subunit displaying the amino  
123 acid changes K417N, E484K, N501Y, and D614G. Multimodular tri-TMH and tri-TMV  
124 constructs contain nanobody modules that target three epitopes comprising a broad range of  
125 residues, and as such, these constructs were expected to be less sensitive to amino acid changes  
126 than the single-module tri-Ty1. The results support this hypothesis, showing that the binding  
127 of tri-Ty1 to the RBD was strongly diminished by the E484K change, while this effect was  
128 mitigated in tri-TMH and tri-TMV (Figure 2). Amino acid changes K417N or N501Y did not  
129 significantly alter the binding affinity on any of the nanobody constructs.

130

131

132

133

134

135

136

137

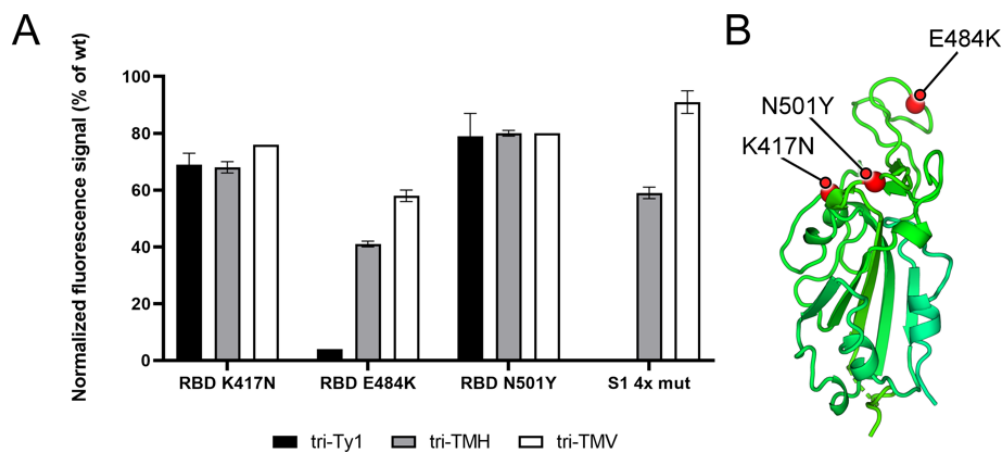

138 **Figure 2. Relative binding strength of trimeric nanobodies to different RBD and Spike S1**  
139 **domain variants on the antigen microarray. A)** Three multimodular nanobody constructs  
140 were tested in a binding array and were shown to bind different RBD or S1 domain variants.  
141 Binding of tri-Ty1 was obstructed by the amino acid change E484K, which is found in the Beta  
142 VOC and linked to neutralization escape (12, 16, 55) The multimodular nanobodies comprised  
143 of modules that target distinct epitopes, tri-TMH and tri-TMV, retained a level of binding to  
144 the E484K RBD variant. The fluorescence signals of Dylight 633-labelled trimeric nanobodies  
145 tri-Ty1, tri-TMH and tri-TMV bound to the different RBD and S1 mutants in the array were  
146 normalized relative to the corresponding wt protein signals in the same array. Error bars  
147 represent the standard deviation of two replicate wells. **B)** Location of the amino acid changes  
148 within the SARS-CoV-2 RBD in the Alpha and Beta variants. Amino acid change N501Y is  
149 found in the Alpha and Beta variants (15, 16), and the Beta variant displays the additional  
150 changes K417N and E484K (16).

151

152

153 **Multimodular nanobodies potently neutralize SARS-CoV-2 wild-type and Alpha.**

154 Multimodular nanobodies targeting SARS-CoV-2 S trimer were designed to increase  
155 neutralization efficacy over single module nanobodies via enhanced avidity. In addition, the  
156 ability of multimodular nanobodies to target distinct epitopes was expected to reduce  
157 neutralization escape by emerging variants. To test these hypotheses, we determined the  
158 neutralization potency of multimodular nanobodies against SARS-CoV-2 variants *in vitro*,  
159 using a plaque-reduction neutralization assay in VeroE6-TMPRSS2 cells (Figure 3). All  
160 multimodular nanobodies neutralized wild-type virus (50 pfu) at ultra-high potency, with IC50  
161 values ranging from 160.9 pM for tri-Ty1, to 83.66 pM for tri-TMV and 50.11 pM for tri-TMH.  
162 This result shows that the multimodular structure improves neutralization efficacy from the  
163 single constituent nanobodies up to hundred-fold, which is in line with recent works presenting  
164 similar, significant increase in neutralization potency over single module nanobodies (38, 41,  
165 57, 58). Neutralization was also tested with virus administered at 1 MOI, where the relative  
166 efficacies of the nanobodies followed the same trends as in the 50 pfu assay, although at  
167 somewhat lower IC50-values ranging from 400 pM to 2 nM (SI Figure S5).

168 To investigate the capability of multimodular nanobodies to neutralize SARS-CoV-2 variants  
169 of concern, we tested tri-TMH, the most potent neutralizer of wild-type SARS-CoV-2 among  
170 our designs, against the wide-spread variants of concern Alpha, Beta, Delta, and Omicron. Tri-  
171 TMH neutralizes SARS-CoV-2 Alpha variant with equivalent potency to wild-type (IC50 =  
172 50.23 pM), and Delta with declined potency (estimated IC50 ~600 pM). The Beta and Omicron  
173 variants, however, escaped neutralization by multimodular nanobodies (Figure 3B). We  
174 hypothesize that the reduction of neutralization potency against Beta and Omicron arises from  
175 the well-known neutralization escape mutation E484K, which is present in the Beta and  
176 Omicron variants, but not in wild-type or the other variants studied. This contrasts with the  
177 antigen microarray data (Figure 2), where nanobodies with three distinct modules were found



178 to retain most of their binding to RBD with this mutation. While neutralization is observed for  
179 the Delta variant, the potency of tri-TMH against delta is reduced, presumably due to the other  
180 changes in Delta, such as L452R, which has been linked to neutralization escape from  
181 antibodies (19, 59).

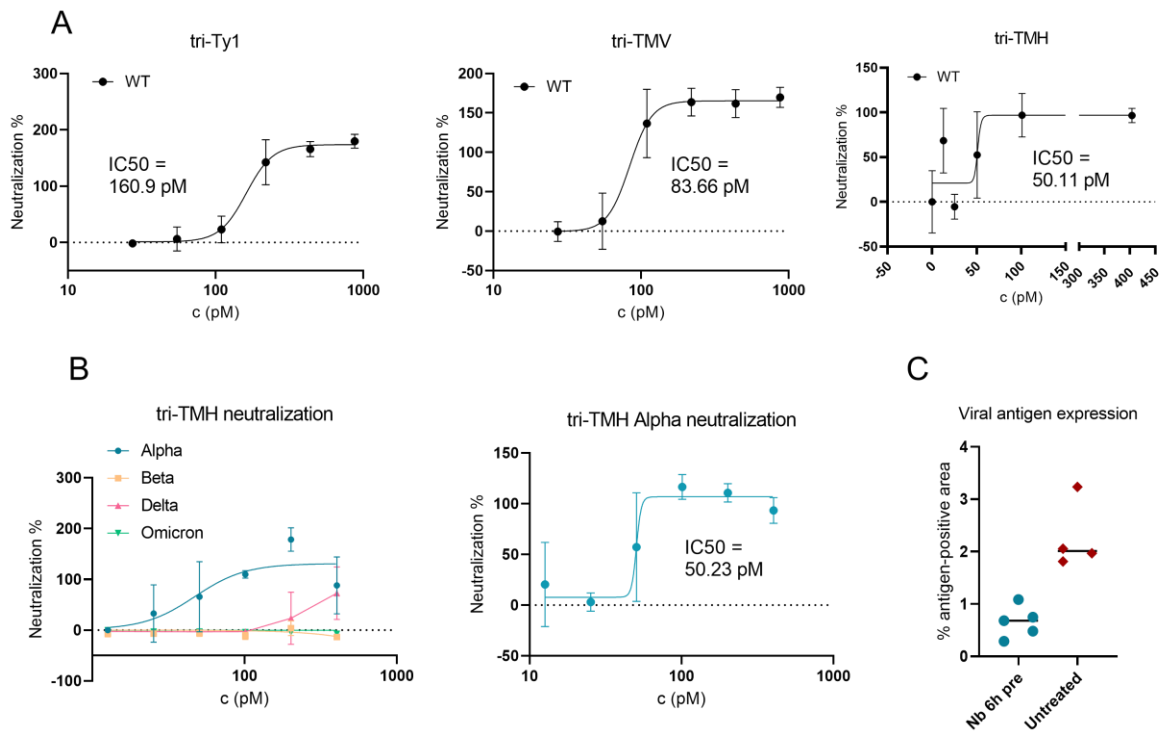

182 **Figure 3. Multimodular nanobodies neutralize SARS-CoV-2 wild-type, Alpha and Delta**  
183 **variants at high potency and limit the course of the disease in a hamster model. A)** Wild-  
184 **type SARS-CoV-2 is neutralized by nanobodies tri-Ty1, tri-TMV, and tri-TMH. B)** Tri-TMH  
185 **neutralizes the Alpha and Delta variants. C)** A morphometric analysis of the presence of SARS-  
186 **CoV-2 antigens in lung tissue sections shows a decrease in viral antigen expression in hamsters**  
187 **pre-treated with multimodular nanobody (Nb 6h pre), compared to untreated individuals (n =**  
188 **5 in nanobody treated group, n = 4 in untreated).**

190

191

192

193

194 **Cryo-EM analysis reveals the conformational landscape of SARS-CoV-2 spike bound to**  
195 **a multimodular nanobody.** While many individual nanobody modules and their binding  
196 epitopes on the S protein have been structurally characterized, these reconstructions may be  
197 incommensurate to linker-connected multimodular nanobody constructs, as they do not  
198 account for the potential steric constraints imposed by linker-bound modules (29-37, 47). As  
199 such, the effects of multimodularity in S-targeting nanobodies on nanobody neutralization  
200 mechanisms remain largely unexplored. We applied cryo-EM to determine the binding mode  
201 of multimodular nanobody tri-TMH to SARS-CoV-2 S protein.

202 The receptor-binding domains of SARS-CoV-2 spike transition between states designated “up”  
203 and “down”, of which the “up” conformation is accessible to ACE2 receptor binding (4, 7).  
204 This natural variation leads to the presence of distinct subpopulations in cryo-EM data, where  
205 the conformational landscape is primarily comprised of fully closed (“all down”) and partially  
206 open (“2 down, 1 up”) states (4, 7, 60). While differential distributions of the two states have  
207 been reported, native spikes on viral surface show 31% and 55% of fully closed and partially  
208 open conformations, respectively (60). Furthermore, certain neutralizing antibodies have been  
209 shown to disrupt the conformation of the spike due to steric incompatibility with the prefusion  
210 state (61, 62).

211 We set out to determine how nanobody tri-TMH impacts the conformation of the spike. Our  
212 cryo-EM data showed that the spike retained a prefusion conformation with subpopulations  
213 presenting the closed and partially open states. Both states are fully bound with tri-TMH  
214 (Figure 4A), although due to the variable placement of the modules, local resolution does not  
215 allow the unambiguous identification of individual nanobody moieties. Our results indicate that  
216 the inclusion of multiple simultaneously binding modules, linked by the commonly used  
217 (GGGGS)<sub>4</sub> linker, does not result in sufficient steric strain to disrupt the prefusion  
218 conformation, and the linker seems to allow the native distribution of RBD conformational

219 states. We postulate that the increased potency of multimodular inhibitors is primarily derived  
220 from enhanced avidity, as opposed to altered mechanistic properties.

221 **Molecular dynamics simulations indicate re-arrangement of nanobody-RBD interface as**  
222 **a result of amino acid changes present in VOC.** Following the cryo-EM analysis that  
223 validated the conformation of the spike and the RBDs, we sought to elucidate the molecular  
224 basis for neutralization evasion as observed for VOC beta (Figure 3) via molecular dynamics  
225 (MD) simulations. Interestingly, many nanobodies, as well as antibodies derived from B cells  
226 of COVID-19 convalescent and vaccinated individuals, show a salt bridge between an antibody  
227 scaffold arginine (R52 in nanobodies) and residue E484 of the RBD (15, 16). As this residue  
228 is the site of amino acid change E484K that is linked to neutralization evasion by VOCs (16,  
229 22, 63), we sought to determine how E484K impacts the interface of RBD and nanobody  
230 modules included in tri-TMH. MD simulations of both WT RBD and E484K RBD were  
231 performed with the individual nanobody module monomers.

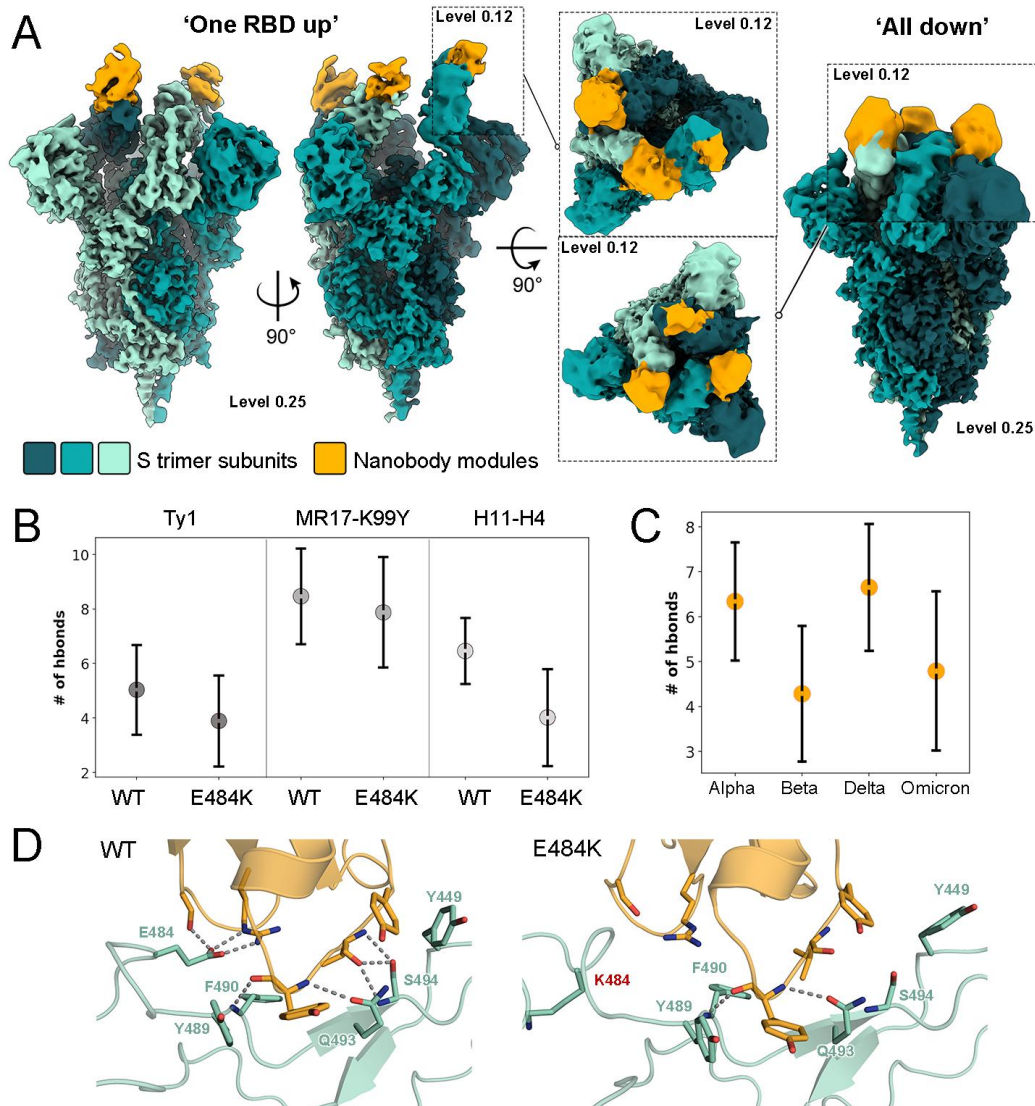

232

233 **Figure 4. Insights into multimodular nanobody binding from cryo-EM analysis and**  
 234 **molecular dynamics simulations.** A) Cryo-EM reconstructions of the S-trimer with  
 235 multimodular nanobody tri-TMH bound. The reconstructions show the typical spike protein  
 236 conformations (one RBD up and all RBDs down). B) Number of hydrogen bonds between  
 237 RBD (wild-type or with E484K amino acid change) and each nanobody module of tri-TMH  
 238 observed from MD simulation data. The dot shows the mean value based on all simulation  
 239 replicas, and the line represents the standard deviation. C) The number of hydrogen bonds  
 240 between nanobody module H11-H4 and the RBD of SARS-CoV-2 VOCs, as predicted by MD  
 241 simulations. D) The interface between nanobody module H11-H4 (orange) and wild-type RBD  
 242 (green). E) The interface between nanobody module H11-H4 (orange) and RBD (green) with  
 243 amino acid change E484K (highlighted in red).

244

245

246 For the MR17-K99Y and H11-H4 modules, the R52-E484 salt bridge was identified to be  
247 extremely stable throughout the WT simulations and in multiple independent simulation  
248 replicas (ca. 95 % of total simulation time). However, when amino acid change E484K was  
249 simulated, the interaction to R52 was rapidly broken (within 1 ns). The dissociation of the salt  
250 bridge as a consequence of charge change from anionic glutamate to positively charged lysine  
251 contributed to higher instability of the E484K RBD, with the surrounding loop becoming more  
252 mobile (Figure S2 and S3, Figure 4D-E). In addition, the number of hydrogen bonds between  
253 RBD and the nanobody modules decreased in the E484K systems (Figure 4B). The majority of  
254 these disrupted hydrogen bonds were identified to be in the conserved RBD binding epitope  
255 (Figure 4D-E). Additional model systems were constructed with the full set of VOC mutations  
256 in the RBD. Here, the Alpha and Delta VOC, where E484 is preserved, behaved similarly to  
257 the WT systems. However, both Beta and Omicron VOC, where E484 is substituted by lysine  
258 and alanine respectively, showed higher instability (SI Figure S2) and a decrease in hydrogen  
259 bonding interactions throughout the simulation (Figure 4C). These data indicate that E484 is  
260 central for strong nanobody binding.

261 **Nanobodies fused to split nanoluciferase fragments detect SARS-CoV-2 Spike at**  
262 **picomolar concentrations.** Antibody-based diagnostics are widely used for detecting SARS-  
263 CoV-2, as they yield results rapidly and are easy to use in point-of-care and outpatient settings  
264 (40). Here, we applied nanobody engineering in the development of a novel SARS-CoV-2  
265 detection assay. The modular nature of nanobodies makes them amenable to fusion with signal  
266 molecules, and their small size allows the targeting of proximal epitopes, such as those  
267 presented by the three subunits of the SARS-CoV-2 spike trimer. These properties align well  
268 with the principle of protein-fragment complementation assays, where the activity of a split  
269 signal molecule, such as a luciferase, a fluorescent protein, or a betalactamase, is restored once  
270 the split fragments are brought into close proximity by the interaction of proteins fused to the

271 fragments (64). Nanobodies shown in Figure 1 target epitopes in the RBD, and we  
272 hypothesized that, when fused to split signal molecule fragments, their binding to the three  
273 spike subunits will reconstitute the signal molecule, potentially allowing sensitive detection in  
274 a single step.

275 Here, we selected the split version of NanoLuc, an engineered 19-kDa luciferase with enhanced  
276 stability and brightness compared to the traditional Renilla and Firefly luciferases (43, 44), as  
277 the signal molecule for the assay. To create the assay components, RBD-binding nanobody  
278 Ty1 (28) was fused with fragments of NanoLuc, titled SmBit or LgBit (42, 44), using flexible  
279 (GGGGS)<sub>4</sub> linkers to connect the nanobody monomer and the signal molecule fragments  
280 (Figure 5).

281 We performed proof-of-principle experiments to gauge the ability of the nanobody-  
282 nanoluciferase fusions to detect recombinantly produced SARS-CoV-2 Spike in solution. 10  
283 nM concentrations of each nanobody fusion, one fused to the LgBit and the other to the SmBit  
284 fragment, were mixed with a dilution series of either recombinant spike or negative control  
285 protein (BSA) and incubated for 15 minutes. The substrate of the nanoluciferase was added  
286 immediately before measurement of luminescence from the reactions. The results show that  
287 the spike signal can be distinguished from an equimolar concentration of the negative control  
288 protein at a concentration as low as 200 pM (Figure 5).

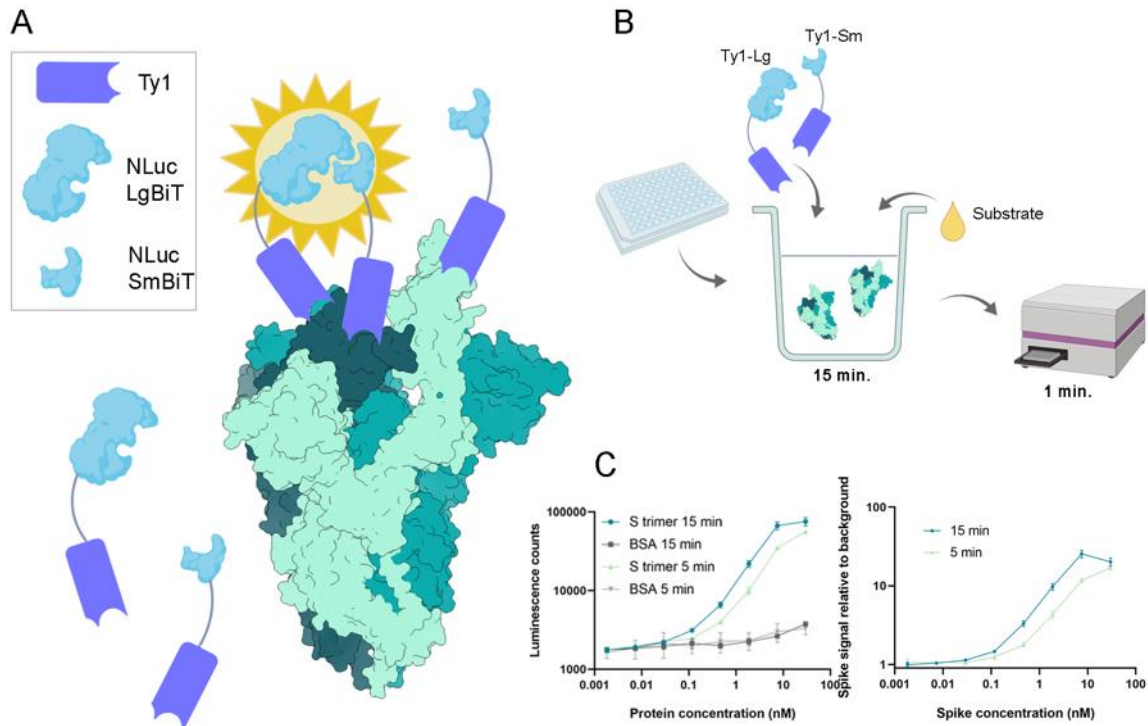

289

290 **Figure 5. SARS-CoV-2 spike protein detection with a proximity-triggered assay.** A) Split  
291 nanoluciferase fragments are fused to Ty1 nanobody (47) with GGGGS<sub>4</sub> linkers. The  
292 enzymatic activity of the luciferase is restored upon nanobody binding to adjacent RBDs. B)  
293 The reaction setup. The nanobody fusions are added into the wells of an opaque white plate  
294 with recombinant spike, and the mixture is incubated for 15 minutes. Then, the substrate is  
295 added, and the luminescence reads are recorded from each well. C) and D) The signal caused  
296 by spike protein can be distinguished from background down to spike concentration of 200  
297 pM.

298

## 299 Discussion

300 In this study, we created potent SARS-CoV-2 neutralizers and a diagnostic assay through  
301 fusions of spike-targeted nanobody modules. Our multimodular nanobodies were linked  
302 together with GGGGS<sub>4</sub>-linkers to facilitate simultaneous binding of the modules to distinct  
303 epitopes (Figure 1) and to increase the avidity of binding. We observed a notable increase (up  
304 to 100-fold) in the neutralization potency of the multimodular constructs relative to the reported  
305 IC<sub>50</sub> values of the single constituent nanobodies (SI Table S1) in neutralization assays  
306 performed with SARS-CoV-2 wild-type, Alpha, and Delta variants of concern. Multimodular

307 nanobodies showed IC<sub>50</sub> values in the 50–160 pM range (Figure 3A-B) in cell culture, and, in  
308 an animal model, prophylactic administration of tri-TMH in the nasal cavity limited tissue  
309 damage in the lungs (Figure 3C).

310 SARS-CoV-2 variants have become the prevalent forms of the virus globally, which warrants  
311 that the potency of new neutralizers is validated against these targets. While WT, Alpha, and  
312 Delta variants were efficiently neutralized by multimodular nanobodies in this work, Beta and  
313 Omicron were significantly less susceptible to neutralization (Figure 3), despite the capability  
314 of tri-TMH and tri-TMV nanobodies to bind variant forms of the RBD (Figure 2). This agrees  
315 with the previously noted pattern of potent antibodies lacking breadth in SARS-CoV-2  
316 neutralization (65).

317 The MD simulations performed in this study indicate that the E484K amino acid change results  
318 in a loss of salt bridge with conserved R52 and larger conformational rearrangement in the  
319 receptor-binding domain (Figure 4), causing disruption of the nanobody binding interface and  
320 leading to the Beta variant escaping neutralization. Notably, the MD simulation data also  
321 revealed interaction trends at the antigen interface that correlate well with the experimentally  
322 observed neutralization capacity (Figure 3). We postulate that this approach, focused on  
323 simulating hydrogen bonding networks and RMSD trends at the antigen interface of emerging  
324 variants may be applied to qualitatively predict the potential for escape from specific  
325 neutralizers.

326 Drawing from the established field of protein-fragment complementation assays, we were  
327 inspired to combine high-affinity nanobody modules with signal molecules to develop new  
328 diagnostic tools. Our novel nanobody-based diagnostic assay was successful at detecting low  
329 concentrations of SARS-CoV-2 spike protein. This is in line with the limit of detection reported  
330 for other antigen test approaches, such as a FRET-based assay (66) and similar to the



331 commercially available rapid point-of-care antigen tests (40). To our knowledge, this is the  
332 first report of a nanobody-based diagnostic approach that makes use of the protein-fragment  
333 complementation toolkit. The observed level of detection shows potential for diagnostic use,  
334 although future applications would require further validation of the technique with patient  
335 samples. In contrast to monoclonal antibodies commonly used in diagnostics, engineered  
336 nanobodies have multiple attractive properties, including cheap and scalable production that  
337 does not require resource-intensive animal tissue cultures (51). It is also becoming feasible to  
338 discover nanobodies from synthetic libraries, allowing the transition away from conventional  
339 animal immunization prevalent in antibody generation (67). Established platforms for the  
340 discovery of nanobodies will allow the application of the diagnostic assay presented here to  
341 different targets, including viruses emerging in the future. We envision that this combination  
342 of nanobody modules with split signal molecules presents a powerful platform for the rapid  
343 development of single-step detection assays for emerging pathogens.

344 The COVID-19 pandemic continues, despite substantial efforts to curb the spread of the  
345 disease, and emerging variants continue to pose challenges for potential SARS-CoV-2  
346 therapeutics. Nanobodies, being inexpensive and readily modified, show great promise as viral  
347 inhibitor candidates and diagnostic tools. Exploring the application of engineered nanobodies  
348 against viral pathogens will facilitate the development of therapeutics against present and  
349 future outbreaks of emerging infectious disease.

350

## 351 **Materials and Methods**

352 **Production and purification of multimodular and luciferase-fused nanobodies.** The  
353 synthetic genes encoding multimodular nanobody constructs and nanobody fusions with split  
354 nanoluciferase were obtained as inserts in pET100/D-TOPO vector backbones (GeneArt,

355 Thermo Fisher Scientific). Nanobodies were expressed in the bacterial cytoplasm using  
356 *Escherichia coli* Rosetta-gami 2 (DE3) cells (Novagen) in autoinduction media. Expression  
357 cultures were grown at 37 °C until OD600 reached 0.5, after which the incubation temperature  
358 was lowered to 28 °C. The cells were harvested after 24 h from inoculation by centrifugation  
359 at 4000 × g, 4 °C, for 15 min. The cell pellets were washed by resuspension in PBS. The pellets  
360 were flash-frozen in liquid nitrogen and stored at -75 °C until purification.

361 To purify the nanobody constructs, the bacterial cell pellets were resuspended in lysis buffer  
362 (10 mM Tris-HCl pH 7.5, 150 mM NaCl). Protease inhibitors and 10 mM imidazole were  
363 added to the lysis buffer when purifying the tri-TMH and tri-TMV constructs. Cytoplasmic  
364 proteins were extracted by lysing the cell suspension in Emulsiflex C3, and the lysate was  
365 clarified by centrifugation at 38 000 × g for 30 min at 4 °C. The clarified lysate was loaded on  
366 a HisTrap FF crude column and washed stepwise with lysis buffer containing 0, 10, 20, 30, and  
367 50 mM imidazole, followed by elution with 300 mM imidazole. The eluate was concentrated  
368 and buffer-exchanged into lysis buffer to remove imidazole using an Amicon Ultra 15 10K  
369 concentrator.

370 To produce an ultrapure nanobody sample, the nanobodies were purified by size-exclusion  
371 chromatography (SEC), using the ÄKTA Go system and a Superdex 75 Increase 10/300  
372 column. When preparing samples for *in vivo* experiments, sample buffer was exchanged into  
373 PBS during SEC. The pooled SEC fractions were further concentrated using an Amicon Ultra  
374 10K 0.5 mL concentrator. Buffer-exchanges, when necessary, were performed in the same  
375 device.

376 To prepare the nanobodies for neutralization assays, His-tags were removed from the proteins  
377 by enterokinase cleavage (Bovine enterokinase, GenScript). Thereafter, the cleaved tags and

378 enzyme were removed from the sample using HisPur Ni-NTA resin (Thermo Scientific) or  
379 SEC as described above.

380 **Production and purification of recombinant SARS-CoV-2 S protein.** SARS-CoV-2 spike  
381 was expressed from a synthetic cDNA template (GeneArt, Life Technologies) encoding the S  
382 protein ectodomain residues 14–1208 from the Wuhan-Hu-1 strain (NCBI Reference  
383 Sequence: YP\_009724390.1) stabilized in the prefusion state (4, 7) with proline substitutions  
384 at residues 986 and 987, an abrogated furin S1/S2 cleavage site with a “GSAS” substitution at  
385 residues 682–685, and a C-terminal T4 fibritin trimerization motif. In our construct, the  
386 trimerization motif was followed by an HRV3C protease cleavage site, SpyTag003 (68), and  
387 8xHisTag. The gene was cloned into the mammalian expression vector pHLsec (69) and  
388 transfected into Expi293F™ (Thermo Fisher Scientific) suspension cells at a density of  
389  $3 \times 10^6$  cells per ml using the ExpiFectamine™ 293 Transfection Kit (Thermo Fisher  
390 Scientific). Transfected cells were cultivated on an orbital shaker at 36.5 °C and 5% CO<sub>2</sub> for  
391 six days, after which supernatant was harvested, clarified by centrifugation, filtered through a  
392 0.45 µm filter, and supplemented with imidazole to 3 mM final concentration. SARS-CoV-2  
393 S-protein was purified from the supernatant by immobilized nickel affinity chromatography  
394 with a 1-ml HisTrap excel column (Cytiva) using 300 mM imidazole for elution. The eluate  
395 was concentrated and buffer exchanged to 10 mM Tris pH 8 + 150 mM NaCl buffer using an  
396 Amicon Ultra centrifugal filter (MWCO 100 kDa, Millipore). Pure S-trimer was used for cryo-  
397 EM grid preparation immediately after purification.

398 **Cryo-EM grid preparation, data acquisition and data processing.** A 3-µl aliquot of a pure,  
399 prefusion SARS-CoV-2 S-trimer (0.3 mg/ml) mixed with tri-TMH (0.05 mg/ml) was applied  
400 on Quantifoil 1.2/1.3 grids (1.2-µm hole diameter, 200 mesh copper) that had been glow  
401 discharged in Plasma Cleaner PDC-002-CE (Harrick Plasma) for 30 s. The grids were blotted

402 for 6 s and plunged into liquid ethane using a vitrification apparatus (Vitrobot, Thermo Fisher  
403 Scientific).

404 Data were collected on a Titan Krios transmission electron microscope (Thermo Fisher  
405 Scientific) equipped with Gatan K2 direct electron detector. EPU v 2.11.0 software was used  
406 to acquire micrographs, and images were collected with a dose of  $1.38 \text{ e}^-/\text{\AA}^2$  per image (SI  
407 Table S2).

408 Data were processed in cryoSPARC (70) Movie frames were aligned and averaged to correct  
409 for beam induced motion. Contrast transfer function (CTF) parameters were estimated using  
410 CTFFIND4 (71). An initial set of particles, picked with the blob-picker, was classified and the  
411 particles in good 2D classes were used to train Topaz particle picker (72, 73). A total of 91,601  
412 particles were selected after cleaning the picked set with 2D classification. An initial volume  
413 with C3 symmetry was calculated *ab initio*. A consensus map of the S trimer, with C3  
414 symmetry applied, was resolved to 2.66-Å resolution. Visual inspection showed that the RBD  
415 region was poorly defined in the consensus map. 3D variance analysis or symmetry-expanded  
416 particles was run using a spherical mask defining the RBD region, six principal modes (i.e.  
417 eigenvectors of the 3D covariance) and eight classes (or clusters). Particles in each class were  
418 subjected to local asymmetric refinement (standard deviation over the prior of rotations and  
419 shifts were 5 degrees and 5 Å, respectively, centered at the box center). This local refinement  
420 prevented symmetry expanded particles from rotating over their symmetry copy. Particles in  
421 the cluster corresponding to the “all-down” conformation were subjected to a second round of  
422 3D variance analysis using 4 principal modes and 4 classes. Particles from 3 of the 4 classes  
423 were combined, symmetry copies removed with the “remove duplicates” function and the map  
424 was locally refined with C3 symmetry. Resolution of the maps was estimated based on the  
425 gold-standard Fourier shell correlation (FSC) criterion of 0.143 (74), and the final maps were  
426 filtered to local resolution.

427 Nanobodies were placed in the cryo-EM density maps by docking molecular models of the S  
428 trimer (PDB: 7A29) and nanobody-RBD complexes (PDB: 6ZHD, 6ZXN, 7CAN) into the  
429 map. First, the “fitmap” function of UCSF Chimera was used to simulate a density for the PDB  
430 reference model to the global resolution of each map. The comparison of the simulated maps  
431 with corresponding reconstructions by the “fitmap” function yielded correlation scores of  
432 0.7269 for the 1-up map and 0.7367 for the all-down map. The “matchmaker” function in  
433 UCSF Chimera was used to match models of nanobody-RBD complexes with the RBDs of the  
434 full spike model. To account for the mobility of the RBDs, the individual Nb-RBD models  
435 were further fitted into the density by the “fitmap” function (correlation scores for Nb-RBD  
436 models: 1-up map 0.8064, 0.7843, 0.7824; all-down map 0.7937, 0.7799, 0.8017). This fitting  
437 process resulted in nanobodies being placed into the remaining density regions unaccounted  
438 for by the spike model.

439 **Proof-of-concept tests for the diagnostic assay with Split NanoLuc-nanobody fusions.** A  
440 dilution series was made in triplicate with purified recombinant Spike in Tris buffer (10 mM  
441 Tris-HCl pH 7.5, 150 mM NaCl). In each well, purified Ty1-LgBiT and Ty1-SmBiT constructs  
442 were added at 10 nM final concentration each. In parallel, an equimolar dilution series of  
443 bovine serum albumin was identically treated with the nanobody constructs to determine the  
444 signal-to-noise ratio in the luminescence reaction. The mixture was incubated for 15 minutes  
445 at room temperature, after which the nanoluciferase substrate coelenterazine H was mixed into  
446 the sample at 200 nM final concentration. Immediately following substrate addition, the  
447 luminescence readings were measured with Perkin-Elmer EnSpire multimode plate reader,  
448 using the ‘Luminescence’ program. To calculate the final luminescence measurement while  
449 taking noise into account, the average readings of each triplicate sample were divided with  
450 corresponding averages from the BSA dilutions.

451 **Labelling of nanobodies with DyLight 633.** The nanobodies were labelled with DyLight 633  
452 in PBS supplemented with 50 mM sodium borate (pH 8.5) at 1 mg/mL protein concentration  
453 and 50  $\mu$ M Dylight 633 NHS ester (Thermo Fischer Scientific) at room temperature for 2h,  
454 followed by removal of unreacted dye with Zeba Spin 7K MWCO desalting columns (Thermo  
455 Scientific).

456 **Antigen array.** Wild type and variant SARS-CoV-2 RBD and Spike S1 domains were  
457 biotinylated and arrayed as duplicate spots (0.1 ng per spot) in the wells of streptavidin-coated  
458 microtitration plates using a piezoelectric non-contact microarray dispenser (Nano-Plotter,  
459 GeSiM, Germany). The antigens were purchased from the following sources: RBD wt (aa 319-  
460 541 of the S protein) and S1 wt (aa 14-681 of the S protein) from Medix Biochemica; RBD  
461 single mutants K417N, E484K and N501Y and S1(K417N, E484K, N501Y, D614G)  
462 quadruple mutant from SinoBiological.

463 **Binding assays on antigen array.** The antigen arrays in microplate wells were blocked with  
464 50  $\mu$ L of Assay buffer (Tris-buffered saline (TBS), pH 8.0 + 0.05% Tween 20) per well for 30  
465 min at RT, followed by three washes with Washing buffer (TBS containing 0.05% Tween 20).  
466 DyLight 633 -labelled nanobody solutions (1  $\mu$ g/mL in Assay buffer) were added 50  $\mu$ L/well,  
467 incubated in a plate shaker at 600 rpm, RT for 1h, followed by three washes with Washing  
468 buffer. Residual liquid droplets were removed by centrifuging the plate upside down on a paper  
469 towel in a plate adapter (453 g, 1 min), after which the plate was let dry for 15 min in a 37°C  
470 room. The Dylight 633 -labelled nanobodies bound to the arrayed antigens were detected by  
471 fluorescence scanning through the clear bottom of the microplate with a Tecan LS400 confocal  
472 laser scanner, using a 633 nm laser for excitation and a 670/25 emission filter.

473 The fluorescence scan images were analyzed with Array-Pro Analyzer software (Media  
474 Cybernetics) and the raw spot signal data was exported to Microsoft Excel for further

475 calculations. Net signals were obtained by subtracting the well background from the raw spot  
476 signals (average pixel intensity in the spot area), after which the spot signals were normalized  
477 to the wild type antigen spot signals in the same well: single RBD mutant signals were  
478 expressed as percentage of the RBD wt signal whereas the quadruple S1 mutant signal was  
479 expressed as percentage of the S1 wt signal.

480 **Neutralization assays.** VeroE6-TMPRSS2-H10 cells (66) were seeded to 96-well plates  
481 (white-sided optically clear bottom PerkinElmer) in density 30 000 cells/well 24 h before the  
482 assay. The nanobodies were diluted in series 1:150 000, 1:300 000, 1:600 000, 1:1 200 000,  
483 1:1 240 000, and 1:4 800 000 in virus growth medium (VGM) containing MEM (Sigma, 2279),  
484 2 % FBS, L-glutamine, and 1x penicillin-streptomycin. Diluted nanobodies were mixed with  
485 the 50 pfu (Figure 3) or MOI 1 (SI Figure S5) (for wild-type, Alpha, Beta, and Delta) or MOI  
486 0.2 (for Omicron) virus and incubated for 1 h at 37°C 5% CO<sub>2</sub>. Thereafter, the cells were treated  
487 with the mixture of the nanobodies and the virus. The virus dilution in VGM without the  
488 nanobodies was used as a negative control and non-infected cells (MOCK) was used as a  
489 positive control of the nanobody neutralization effectiveness. After 5 days of incubation the  
490 medium was removed, and cells were treated with CellTiter-Glo 2.0 cell viability assay reagent  
491 (Promega, G9243) for 20 min at RT. Then, the cellular ATP was measured via the detection of  
492 luminescent signal using HIDEX Sence microplate reader (Hidex Oy, Finland) Viability of the  
493 MOCK infected cells was considered as 100 %. Neutralization efficacy percentage for each  
494 measurement was calculated considering MOCK infected cells as 100% neutralization and  
495 untreated, virus infected cells as 0% neutralization. Curve-fitting and IC<sub>50</sub> calculation was  
496 performed for the normalized neutralization data with GraphPad Prism version 9.2.0 for  
497 Windows, using the Nonlinear regression method (Absolute IC<sub>50</sub>, X is concentration), with  
498 baseline constraint set to zero.

499 **Animal experiments.** A total of 20 male and female Syrian Golden hamsters were obtained  
500 from (Scanbur, Karl SloaneStran, Denmark), moved to the University of Helsinki biosafety  
501 level-3 (BSL-3) facility and allowed to acclimatize to individually ventilated biocontainment  
502 cages (ISOcage; Scanbur, Karl SloaneStran, Denmark) for seven days with ad libitum water  
503 and food (rodent pellets) prior to infection.

504 For the main experiment, six 8-week-old male and female Syrian Golden hamsters received 30  
505  $\mu\text{g}$  of nanobody, in 0.61 mg/mL concentration, 6 h prior to intranasal infection with  $5 \times 10^4$   
506 SARS-CoV-2 (wt/D614G strain). The control group received an equal volume of PBS (n = 4).  
507 Euthanasia was performed under terminal isoflurane anaesthesia with cervical dislocation and  
508 were dissected immediately after death. Samples were collected from the lungs for RT-qPCR  
509 and the remaining lung tissue including trachea, heart, oesophagus and bronchial lymph nodes  
510 were immersed in 10% buffered formalin. After 48 h, the tissue was transferred to and stored  
511 in 70% ethanol until processing for histological and immunohistological examination.

512 **RT-qPCR.** RNA was extracted from lung samples using Trizol (Thermo Scientific) according  
513 to the manufacturers' instructions. Isolated RNA was directly subjected to one-step RT-qPCR  
514 analysis based on a previously described protocol for RdRp (75) and for E and subE genes (76)  
515 with TaqMan fast virus 1-step master mix (Thermo Scientific) using AriaMx instrumentation  
516 (Agilent, Santa Clara, CA, USA). The actin RT-qPCR used for normalization is described in  
517 (77). Fold differences between samples were calculated by the comparative Ct method (78)  
518 using the average of normalized Ct values from non-nanobody treated infected animal lung  
519 tissues as reference.

520 **Histological, immunohistological and morphometrical analyses.** Three to five cross  
521 sections were prepared from the fixed lung tissue and routinely paraffin wax embedded.  
522 Consecutive sections (3-5  $\mu\text{m}$ ) were prepared and stained with hematoxylin eosin (HE) for



523 histological examination or subjected to immunohistological staining for SARS-CoV-2 antigen  
524 expression, using a previously published staining protocol (79). For immunohistology, the  
525 horseradish peroxidase method was applied. Rabbit anti-SARS-CoV nucleocapsid protein  
526 (Rockland, 200-402-A50) served as the primary antibody, and DAB (EnVision FLEX DAB+  
527 Chromogen in Substrate buffer; Agilent) for visualization of antibody binding. All incubations  
528 took place in an autostainer (Dako). Sections were subsequently counterstained with  
529 haematoxylin.

530 For morphometric analysis, the immunostained sections were scanned (NanoZoomer-XR  
531 C12000; Hamamatsu, Hamamatsu City, Japan) and analysed using the software programme  
532 Visiopharm (Visiopharm 2020.08.1.8403; Visiopharm, Hoersholm, Denmark) to quantify the  
533 area of viral antigen expression in relation to the total area (= area occupied by lung  
534 parenchyma) in the sections. This was used to compare the extent of viral antigen expression  
535 in the lungs between untreated and treated animals. A first app was applied that outlined the  
536 entire lung tissue as ROI (total area). For this a Decision Forest method was used and the  
537 software was trained to detect the lung tissue section (total area). Once the lung section was  
538 outlined as ROI the lumen of large bronchi and vessels was manually excluded from the ROI.  
539 Subsequently, a second app with Decision Forest method was trained to detect viral antigen  
540 expression (as brown DAB precipitate) within the ROI.

541 **Molecular dynamics simulations of nanobody-RBD interface.** MD simulations were  
542 performed on the model systems constructed using the cryo-EM structure of nanobody  
543 monomers and RBD (PDB 6ZXX, 7CAN, 6ZBP). During model system construction long  
544 glycine linkers were removed. VMD psfgen tool (80) was employed to add missing hydrogen  
545 atoms, make point mutations, and solvate the systems with TIP3P water and 0.1 M NaCl to  
546 give a total system size of ca. 150,000 atoms. The force field for all components of the system  
547 was CHARMM36 (81). GROMACS v20.3 (82) was used for all equilibration and production

548 simulations. First, the initial systems were minimized with restraints on heavy protein atoms  
549 ( $20,000 \text{ kJ mol}^{-1} \text{ nm}^{-2}$ ). Following convergence, a 100 ps NVT equilibration was performed  
550 with the same restraints, followed by a 10 ns NPT with the restraints only on the protein  
551 backbone atoms. All restraints were removed for the production runs, which employed the  
552 LINCS algorithm (83) to achieve a 2 fs timestep and used the Nosé -Hoover thermostat (84,  
553 85) to maintain 310 K temperature and the Parrinello-Rahman barostat (86) to maintain 1 atm  
554 pressure. The electrostatic interactions were controlled by the particle mesh Ewald method (87)  
555 with a 12 Å cutoff, while the van der Waals cutoff was also 12 Å, with a switching distance of  
556 10 Å. Multiple independent simulation replicas were performed and trajectories were  
557 visualized and analyzed using VMD (80) and Pymol (The PyMOL Molecular Graphics System,  
558 Version 1.2r3pre, Schrödinger, LLC). **Table S3** lists system setups and their respective lengths.

559 **Molecular graphics.** Molecular graphics images were generated using PyMOL (The PyMOL  
560 Molecular Graphics System, Version 2.4.0a0, Schrödinger, LLC), UCSF Chimera (88), and  
561 UCSF ChimeraX (89).

562 **Protein interface analysis.** Residues comprising the epitopes of nanobody modules Ty1 (PDB  
563 6ZXX), H11-H4 (PDB 6ZH9), MR17-K99Y (PDB 7CAN) and VHH V (PDB 7KN6) on  
564 SARS-CoV-2 S were identified using the PDB ePISA server (90).

565

## 566 **Acknowledgements**

567 This work was funded by the Academy of Finland (project number 336492/JH 336490/OV and  
568 339510/TS, 338176/VS) VEO - European Union's Horizon 2020 (grant number 874735 to  
569 OV), the Jane and Aatos Erkko Foundation (to OV, VS), Sigrid Jusélius Foundation (to OV,  
570 VS), and Helsinki University Hospital Funds (TYH2018322 and TYH2021343 to OV). The  
571 authors acknowledge CSC – IT Center for Science, Finland, for computational resources. Cryo-

572 EM data was collected at the Umeå Core Facility for Electron Microscopy, a node of the Cryo-  
573 EM Swedish National Facility, funded by the Knut and Alice Wallenberg, Family Erling  
574 Persson and Kempe Foundations, SciLifeLab, Stockholm University and Umeå University.  
575 The use of the facilities and expertise of the Instruct-HiLIFE cryo-EM unit, member of  
576 Biocenter Finland and Instruct-FI, is gratefully acknowledged, as well as the staff at HUSLAB  
577 Virology and Immunology for providing samples for virus isolation. Part of the work was  
578 carried out with the support of HiLIFE Laboratory Animal Centre Core Facility, University of  
579 Helsinki, Finland.

580 **Competing interests statement.** The authors declare no competing interest.

581 **References**

- 582 1. B. D. Kevadiya *et al.*, Diagnostics for SARS-CoV-2 infections. *Nat Mater* **20**, 593-605  
583 (2021). 10.1038/s41563-020-00906-z
- 584 2. Y. C. Hwang *et al.*, Monoclonal antibodies for COVID-19 therapy and SARS-CoV-2  
585 detection. *J Biomed Sci* **29**, 1 (2022). 10.1186/s12929-021-00784-w
- 586 3. A. Torrente-Lopez *et al.*, The Relevance of Monoclonal Antibodies in the Treatment of  
587 COVID-19. *Vaccines (Basel)* **9**, (2021). 10.3390/vaccines9060557
- 588 4. A. C. Walls *et al.*, Structure, Function, and Antigenicity of the SARS-CoV-2 Spike  
589 Glycoprotein. *Cell* **181**, 281-292.e286 (2020). 10.1016/j.cell.2020.02.058
- 590 5. C. O. Barnes *et al.*, Structures of Human Antibodies Bound to SARS-CoV-2 Spike  
591 Reveal Common Epitopes and Recurrent Features of Antibodies. *Cell* **182**, 828-842  
592 (2020). 10.1016/j.cell.2020.06.025
- 593 6. M. Hoffmann *et al.*, SARS-CoV-2 Cell Entry Depends on ACE2 and TMPRSS2 and Is  
594 Blocked by a Clinically Proven Protease Inhibitor. *Cell* **181**, 271-280.e278 (2020).  
595 10.1016/j.cell.2020.02.052
- 596 7. D. Wrapp *et al.*, Cryo-EM structure of the 2019-nCoV spike in the prefusion  
597 conformation. **367**, 1260-1263 (2020). 10.1126/science.abb2507
- 598 8. R. Yan *et al.*, Structural basis for the recognition of SARS-CoV-2 by full-length human  
599 ACE2. *Science* **367**, 1444-1448 (2020). 10.1126/science.abb2762
- 600 9. J. Shang *et al.*, Structural basis of receptor recognition by SARS-CoV-2. *Nature* **581**,  
601 221-224 (2020). 10.1038/s41586-020-2179-y
- 602 10. M. Hoffmann, H. Kleine-Weber, S. Pohlmann, A Multibasic Cleavage Site in the Spike  
603 Protein of SARS-CoV-2 Is Essential for Infection of Human Lung Cells. *Mol Cell* **78**,  
604 779-784.e775 (2020). 10.1016/j.molcel.2020.04.022

- 605 11. K. Subbarao, The success of SARS-CoV-2 vaccines and challenges ahead. *Cell Host*  
606 *Microbe* **29**, 1111-1123 (2021). 10.1016/j.chom.2021.06.016
- 607 12. Y. Weisblum *et al.*, Escape from neutralizing antibodies by SARS-CoV-2 spike protein  
608 variants. *Elife* **9**, e61312 (2020). 10.7554/eLife.61312
- 609 13. Y. Zhang, J. L. Banga Ndzouboukou, M. Gan, X. Lin, X. Fan, Immune Evasive Effects  
610 of SARS-CoV-2 Variants to COVID-19 Emergency Used Vaccines. *Front Immunol*  
611 **12**, 771242 (2021). 10.3389/fimmu.2021.771242
- 612 14. T. Tada *et al.*, Increased resistance of SARS-CoV-2 Omicron variant to neutralization  
613 by vaccine-elicited and therapeutic antibodies. *EBioMedicine* **78**, 103944 (2022).  
614 10.1016/j.ebiom.2022.103944
- 615 15. P. Supasa *et al.*, Reduced neutralization of SARS-CoV-2 B.1.1.7 variant by  
616 convalescent and vaccine sera. *Cell* **184**, 2201-2211.e2207 (2021).  
617 10.1016/j.cell.2021.02.033
- 618 16. D. Zhou *et al.*, Evidence of escape of SARS-CoV-2 variant B.1.351 from natural and  
619 vaccine-induced sera. *Cell* **184**, 2348-2361.e2346 (2021). 10.1016/j.cell.2021.02.037
- 620 17. H. Tegally *et al.*, Detection of a SARS-CoV-2 variant of concern in South Africa.  
621 *Nature* **592**, 438-443 (2021). 10.1038/s41586-021-03402-9
- 622 18. N. G. Davies *et al.*, Estimated transmissibility and impact of SARS-CoV-2 lineage  
623 B.1.1.7 in England. *Science* **372**, eabg3055 (2021). 10.1126/science.abg3055
- 624 19. P. Mlcochova *et al.*, SARS-CoV-2 B.1.617.2 Delta variant replication and immune  
625 evasion. *Nature* **599**, 114-119 (2021). 10.1038/s41586-021-03944-y
- 626 20. Y. Cao *et al.*, Humoral immune response to circulating SARS-CoV-2 variants elicited  
627 by inactivated and RBD-subunit vaccines. *Cell Res* **31**, 732-741 (2021).  
628 10.1038/s41422-021-00514-9

- 629 21. A. Tuekprakhon *et al.*, Antibody escape of SARS-CoV-2 Omicron BA.4 and BA.5 from  
630 vaccine and BA.1 serum. *Cell* **185**, 2422-2433.e2413 (2022).  
631 10.1016/j.cell.2022.06.005
- 632 22. W. B. Wang *et al.*, E484K mutation in SARS-CoV-2 RBD enhances binding affinity  
633 with hACE2 but reduces interactions with neutralizing antibodies and nanobodies:  
634 Binding free energy calculation studies. *J Mol Graph Model* **109**, 108035 (2021).  
635 10.1016/j.jmgm.2021.108035
- 636 23. A. Baum *et al.*, Antibody cocktail to SARS-CoV-2 spike protein prevents rapid  
637 mutational escape seen with individual antibodies. *Science* **369**, 1014-1018 (2020).  
638 10.1126/science.abd0831
- 639 24. Y. Kakinoki *et al.*, Impact of Antibody Cocktail Therapy Combined with Casirivimab  
640 and Imdevimab on Clinical Outcome for patients with COVID-19 in A Real-Life  
641 Setting: A Single Institute Analysis. *Int J Infect Dis* **117**, 189-194 (2022).  
642 10.1016/j.ijid.2022.01.067
- 643 25. F. D. Mast *et al.*, Highly synergistic combinations of nanobodies that target SARS-  
644 CoV-2 and are resistant to escape. *eLife* **10**, e73027 (2021). 10.7554/eLife.73027
- 645 26. Y. Wang *et al.*, Nanobody-derived nanobiotechnology tool kits for diverse biomedical  
646 and biotechnology applications. *International Journal of Nanomedicine* **11**, 3287-3303  
647 (2016). 10.2147/IJN.S107194
- 648 27. S. Nambulli *et al.*, Inhalable Nanobody (PiN-21) prevents and treats SARS-CoV-2  
649 infections in Syrian hamsters at ultra-low doses. *Science Advances* **7**, eabh0319 (2021).  
650 10.1126/sciadv.abh0319
- 651 28. L. Hanke *et al.*, An alpaca nanobody neutralizes SARS-CoV-2 by blocking receptor  
652 interaction. *Nature Communications* **11**, 1-9 (2020). 10.1038/s41467-020-18174-5

- 653 29. J. Huo *et al.*, Neutralizing nanobodies bind SARS-CoV-2 spike RBD and block  
654 interaction with ACE2. *Nature Structural and Molecular Biology* **27**, 846-854 (2020).  
655 10.1038/s41594-020-0469-6
- 656 30. T. Li *et al.*, A synthetic nanobody targeting RBD protects hamsters from SARS-CoV-  
657 2 infection. *Nat Commun* **12**, 4635 (2021). 10.1038/s41467-021-24905-z
- 658 31. D. Wrapp *et al.*, Structural Basis for Potent Neutralization of Betacoronaviruses by  
659 Single-Domain Camelid Antibodies. *Cell* **181**, 1004-1015.e1015 (2020).  
660 10.1016/j.cell.2020.04.031
- 661 32. P. Pymm *et al.*, Nanobody cocktails potently neutralize SARS-CoV-2 D614G N501Y  
662 variant and protect mice. *Proc Natl Acad Sci U S A* **118**, e2101918118 (2021).  
663 10.1073/pnas.2101918118
- 664 33. H. Ma *et al.*, Potent Neutralization of SARS-CoV-2 by Hetero-bivalent Alpaca  
665 Nanobodies Targeting the Spike Receptor-Binding Domain. *J Virol* **95**, e02438-02420  
666 (2021). 10.1128/JVI.02438-20
- 667 34. G. Valenzuela Nieto *et al.*, Potent neutralization of clinical isolates of SARS-CoV-2  
668 D614 and G614 variants by a monomeric, sub-nanomolar affinity nanobody. *Scientific*  
669 *Reports* **11**, 3318-3318 (2021). 10.1038/s41598-021-82833-w
- 670 35. J. Xu *et al.*, Nanobodies from camelid mice and llamas neutralize SARS-CoV-2  
671 variants. *Nature* **595**, 278-282 (2021). 10.1038/s41586-021-03676-z
- 672 36. J. Dong *et al.*, Development of multi-specific humanized llama antibodies blocking  
673 SARS-CoV-2/ACE2 interaction with high affinity and avidity. *Emerging Microbes &*  
674 *Infections* **9**, 1034-1036 (2020). 10.1080/22221751.2020.1768806
- 675 37. T. J. Esparza, N. P. Martin, G. P. Anderson, E. R. Goldman, D. L. Brody, High affinity  
676 nanobodies block SARS-CoV-2 spike receptor binding domain interaction with human

- 677           angiotensin converting enzyme. *Scientific Reports* **10**, (2020). 10.1038/s41598-020-  
678           79036-0
- 679   38.    A. Hultberg *et al.*, Llama-derived single domain antibodies to build multivalent,  
680           superpotent and broadened neutralizing anti-viral molecules. *PLoS One* **6**, e17665  
681           (2011). 10.1371/journal.pone.0017665
- 682   39.    C. Palomo *et al.*, Trivalency of a Nanobody Specific for the Human Respiratory  
683           Syncytial Virus Fusion Glycoprotein Drastically Enhances Virus Neutralization and  
684           Impacts Escape Mutant Selection. *Antimicrob Agents Chemother* **60**, 6498-6509  
685           (2016). 10.1128/AAC.00842-16
- 686   40.    V. M. Corman *et al.*, Comparison of seven commercial SARS-CoV-2 rapid point-of-  
687           care antigen tests: a single-centre laboratory evaluation study. *The Lancet Microbe* **2**,  
688           e311-e319 (2021). 10.1016/s2666-5247(21)00056-2
- 689   41.    P.-A. Koenig, F. I. Schmidt, Structure-guided multivalent nanobodies block SARS-  
690           CoV-2 infection and suppress mutational escape. *Science* **6230**, 6-6 (2021).
- 691   42.    M. P. Hall *et al.*, Engineered luciferase reporter from a deep sea shrimp utilizing a novel  
692           imidazopyrazinone substrate. *ACS Chem Biol* **7**, 1848-1857 (2012).  
693           10.1021/cb3002478
- 694   43.    C. G. England, E. B. Ehlerding, W. Cai, NanoLuc: A Small Luciferase Is Brightening  
695           Up the Field of Bioluminescence. *Bioconjug Chem* **27**, 1175-1187 (2016).  
696           10.1021/acs.bioconjchem.6b00112
- 697   44.    Y. Ohmuro-Matsuyama, H. Ueda, in *Bioluminescence - Analytical Applications and*  
698           *Basic Biology*. (IntechOpen, 2019).
- 699   45.    P. J. M. Brouwer *et al.*, Potent neutralizing antibodies from COVID-19 patients define  
700           multiple targets of vulnerability. *Science* **369**, 643-650 (2020).  
701           10.1126/science.abc5902



- 702 46. B. Ju *et al.*, Human neutralizing antibodies elicited by SARS-CoV-2 infection. *Nature*  
703 **584**, 115-119 (2020). 10.1038/s41586-020-2380-z
- 704 47. L. Hanke *et al.*, An alpaca nanobody neutralizes SARS-CoV-2 by blocking receptor  
705 interaction. *Nat Commun* **11**, 4420 (2020). 10.1038/s41467-020-18174-5
- 706 48. L. Cao *et al.*, De novo design of picomolar SARS-CoV-2 miniprotein inhibitors.  
707 *Science* **370**, 426-431 (2020). 10.1126/science.abd9909
- 708 49. Y. Cai *et al.*, Distinct conformational states of SARS-CoV-2 spike protein. *Science* **369**,  
709 1586-1592 (2020). 10.1126/science.abd4251
- 710 50. R. Henderson *et al.*, Controlling the SARS-CoV-2 spike glycoprotein conformation.  
711 *Nat Struct Mol Biol* **27**, 925-933 (2020). 10.1038/s41594-020-0479-4
- 712 51. S. Steeland, R. E. Vandenbroucke, C. Libert, Nanobodies as therapeutics: big  
713 opportunities for small antibodies. *Drug Discov Today* **21**, 1076-1113 (2016).  
714 10.1016/j.drudis.2016.04.003
- 715 52. T. Chanier, P. Chames, Nanobody Engineering: Toward Next Generation  
716 Immunotherapies and Immunoimaging of Cancer. *Antibodies (Basel)* **8**, 13 (2019).  
717 10.3390/antib8010013
- 718 53. A. Desmyter *et al.*, Neutralization of Human Interleukin 23 by Multivalent Nanobodies  
719 Explained by the Structure of Cytokine-Nanobody Complex. *Front Immunol* **8**, 884  
720 (2017). 10.3389/fimmu.2017.00884
- 721 54. J. Lan *et al.*, Structure of the SARS-CoV-2 spike receptor-binding domain bound to the  
722 ACE2 receptor. *Nature* **581**, 215-220 (2020). 10.1038/s41586-020-2180-5
- 723 55. P. Wang *et al.*, Antibody resistance of SARS-CoV-2 variants B.1.351 and B.1.1.7.  
724 *Nature* **593**, 130-135 (2021). 10.1038/s41586-021-03398-2
- 725 56. D. Planas *et al.*, Sensitivity of infectious SARS-CoV-2 B.1.1.7 and B.1.351 variants to  
726 neutralizing antibodies. *Nat Med* **27**, 917-924 (2021). 10.1038/s41591-021-01318-5

- 727 57. M. Schoof *et al.*, An ultrapotent synthetic nanobody neutralizes SARS-CoV-2 by  
728 stabilizing inactive Spike. *Science* **3255**, eabe3255-eabe3255 (2020).  
729 10.1126/science.abe3255
- 730 58. Y. Xiang *et al.*, Versatile and multivalent nanobodies efficiently neutralize SARS-CoV-  
731 2. *Science* **4747**, eabe4747-eabe4747 (2020). 10.1126/science.abe4747
- 732 59. X. Deng *et al.*, Transmission, infectivity, and neutralization of a spike L452R SARS-  
733 CoV-2 variant. *Cell* **184**, 3426-3437 e3428 (2021). 10.1016/j.cell.2021.04.025
- 734 60. Z. Ke *et al.*, Structures and distributions of SARS-CoV-2 spike proteins on intact  
735 virions. *Nature* **588**, 498-502 (2020). 10.1038/s41586-020-2665-2
- 736 61. J. Huo *et al.*, Neutralization of SARS-CoV-2 by Destruction of the Prefusion Spike.  
737 *Cell Host Microbe* **28**, 445-454 e446 (2020). 10.1016/j.chom.2020.06.010
- 738 62. T. Li *et al.*, Cross-neutralizing antibodies bind a SARS-CoV-2 cryptic site and resist  
739 circulating variants. *Nat Commun* **12**, 5652 (2021). 10.1038/s41467-021-25997-3
- 740 63. Z. Cui *et al.*, Structural and functional characterizations of infectivity and immune  
741 evasion of SARS-CoV-2 Omicron. *Cell* **185**, 860-871 e813 (2022).  
742 10.1016/j.cell.2022.01.019
- 743 64. E. Blaszcak, N. Lazarewicz, A. Sudevan, R. Wysocki, G. Rabut, Protein-fragment  
744 complementation assays for large-scale analysis of protein-protein interactions.  
745 *Biochem Soc Trans* **49**, 1337-1348 (2021). 10.1042/BST20201058
- 746 65. C. Dacon *et al.*, Broadly neutralizing antibodies target the coronavirus fusion peptide.  
747 *Science* **377**, 728-735 (2022). doi:10.1126/science.abq3773
- 748 66. J. Rusanen *et al.*, A Generic, Scalable, and Rapid Time-Resolved Förster Resonance  
749 Energy Transfer-Based Assay for Antigen Detection - SARS-CoV-2 as a Proof of  
750 Concept. *mBio* **12**, e00902-00921 (2021). doi:10.1128/mBio.00902-21

- 751 67. S. Muyldermans, Applications of Nanobodies. *Annu Rev Anim Biosci* **9**, 401-421  
752 (2021). 10.1146/annurev-animal-021419-083831
- 753 68. A. H. Keeble *et al.*, Approaching infinite affinity through engineering of peptide-  
754 protein interaction. *Proc Natl Acad Sci U S A* **116**, 26523-26533 (2019).  
755 10.1073/pnas.1909653116
- 756 69. A. R. Aricescu, W. Lu, E. Y. Jones, A time- and cost-efficient system for high-level  
757 protein production in mammalian cells. *Acta Crystallogr D Biol Crystallogr* **62**, 1243-  
758 1250 (2006). 10.1107/S09074444906029799
- 759 70. A. Punjani, J. L. Rubinstein, D. J. Fleet, M. A. Brubaker, cryoSPARC: algorithms for  
760 rapid unsupervised cryo-EM structure determination. *Nat Methods* **14**, 290-296 (2017).  
761 10.1038/nmeth.4169
- 762 71. A. Rohou, N. Grigorieff, CTFFIND4: Fast and accurate defocus estimation from  
763 electron micrographs. *J Struct Biol* **192**, 216-221 (2015). 10.1016/j.jsb.2015.08.008
- 764 72. T. Bepler, K. Kelley, A. J. Noble, B. Berger, Topaz-Denoise: general deep denoising  
765 models for cryoEM and cryoET. *Nat Commun* **11**, 5208 (2020). 10.1038/s41467-020-  
766 18952-1
- 767 73. T. Bepler *et al.*, Positive-unlabeled convolutional neural networks for particle picking  
768 in cryo-electron micrographs. *Nat Methods* **16**, 1153-1160 (2019). 10.1038/s41592-  
769 019-0575-8
- 770 74. S. H. Scheres, S. Chen, Prevention of overfitting in cryo-EM structure determination.  
771 *Nat Methods* **9**, 853-854 (2012). 10.1038/nmeth.2115
- 772 75. V. M. Corman *et al.*, Detection of 2019 novel coronavirus (2019-nCoV) by real-time  
773 RT-PCR. *Euro Surveill* **25**, (2020). 10.2807/1560-7917.ES.2020.25.3.2000045

- 774 76. G. Dagotto *et al.*, Comparison of Subgenomic and Total RNA in SARS-CoV-2-  
775 Challenged Rhesus Macaques. *Journal of Virology* **95**, e02370-02320 (2021).  
776 doi:10.1128/JVI.02370-20
- 777 77. M. Zivcec, D. Safronetz, E. Haddock, H. Feldmann, H. Ebihara, Validation of assays  
778 to monitor immune responses in the Syrian golden hamster (*Mesocricetus auratus*). *J*  
779 *Immunol Methods* **368**, 24-35 (2011). 10.1016/j.jim.2011.02.004
- 780 78. T. D. Schmittgen, K. J. Livak, Analyzing real-time PCR data by the comparative CT  
781 method. *Nature Protocols* **3**, 1101-1108 (2008). 10.1038/nprot.2008.73
- 782 79. J. Huo *et al.*, A potent SARS-CoV-2 neutralising nanobody shows therapeutic efficacy  
783 in the Syrian golden hamster model of COVID-19. *Nature Communications* **12**, (2021).  
784 10.1038/s41467-021-25480-z
- 785 80. W. Humphrey, A. Dalke, K. Schulten, VMD: Visual molecular dynamics. *Journal of*  
786 *Molecular Graphics* **14**, 33-38 (1996). [https://doi.org/10.1016/0263-7855\(96\)00018-5](https://doi.org/10.1016/0263-7855(96)00018-5)
- 787 81. A. D. MacKerell *et al.*, All-Atom Empirical Potential for Molecular Modeling and  
788 Dynamics Studies of Proteins. *The Journal of Physical Chemistry B* **102**, 3586-3616  
789 (1998). 10.1021/jp973084f
- 790 82. M. J. Abraham *et al.*, GROMACS: High performance molecular simulations through  
791 multi-level parallelism from laptops to supercomputers. *SoftwareX* **1-2**, 19-25 (2015).  
792 <https://doi.org/10.1016/j.softx.2015.06.001>
- 793 83. B. Hess, P-LINCS: A Parallel Linear Constraint Solver for Molecular Simulation.  
794 *Journal of Chemical Theory and Computation* **4**, 116-122 (2008). 10.1021/ct700200b
- 795 84. W. G. Hoover, Canonical dynamics: Equilibrium phase-space distributions. *Physical*  
796 *Review A* **31**, 1695-1697 (1985). 10.1103/PhysRevA.31.1695
- 797 85. S. Nosé, A unified formulation of the constant temperature molecular dynamics  
798 methods. *The Journal of Chemical Physics* **81**, 511-519 (1984). 10.1063/1.447334

- 799 86. M. Parrinello, A. Rahman, Polymorphic transitions in single crystals: A new molecular  
800 dynamics method. *Journal of Applied Physics* **52**, 7182-7190 (1981). 10.1063/1.328693
- 801 87. T. Darden, D. York, L. Pedersen, Particle mesh Ewald: An N·log(N) method for Ewald  
802 sums in large systems. *The Journal of Chemical Physics* **98**, 10089-10092 (1993).  
803 10.1063/1.464397
- 804 88. E. F. Pettersen *et al.*, UCSF Chimera--a visualization system for exploratory research  
805 and analysis. *Journal of computational chemistry* **25**, 1605-1612 (2004).  
806 10.1002/jcc.20084
- 807 89. E. F. Pettersen *et al.*, UCSF ChimeraX: Structure visualization for researchers,  
808 educators, and developers. *Protein Sci* **30**, 70-82 (2021). 10.1002/pro.3943
- 809 90. E. Krissinel, K. Henrick, Inference of macromolecular assemblies from crystalline  
810 state. *J Mol Biol* **372**, 774-797 (2007). 10.1016/j.jmb.2007.05.022

811
